# Supplementary material
Source: PubMed Central journal article supplement (PMC539768)
Supplement: pnas_101_52_18042__3.pdf [file pnas_101_52_18042__3.pdf]

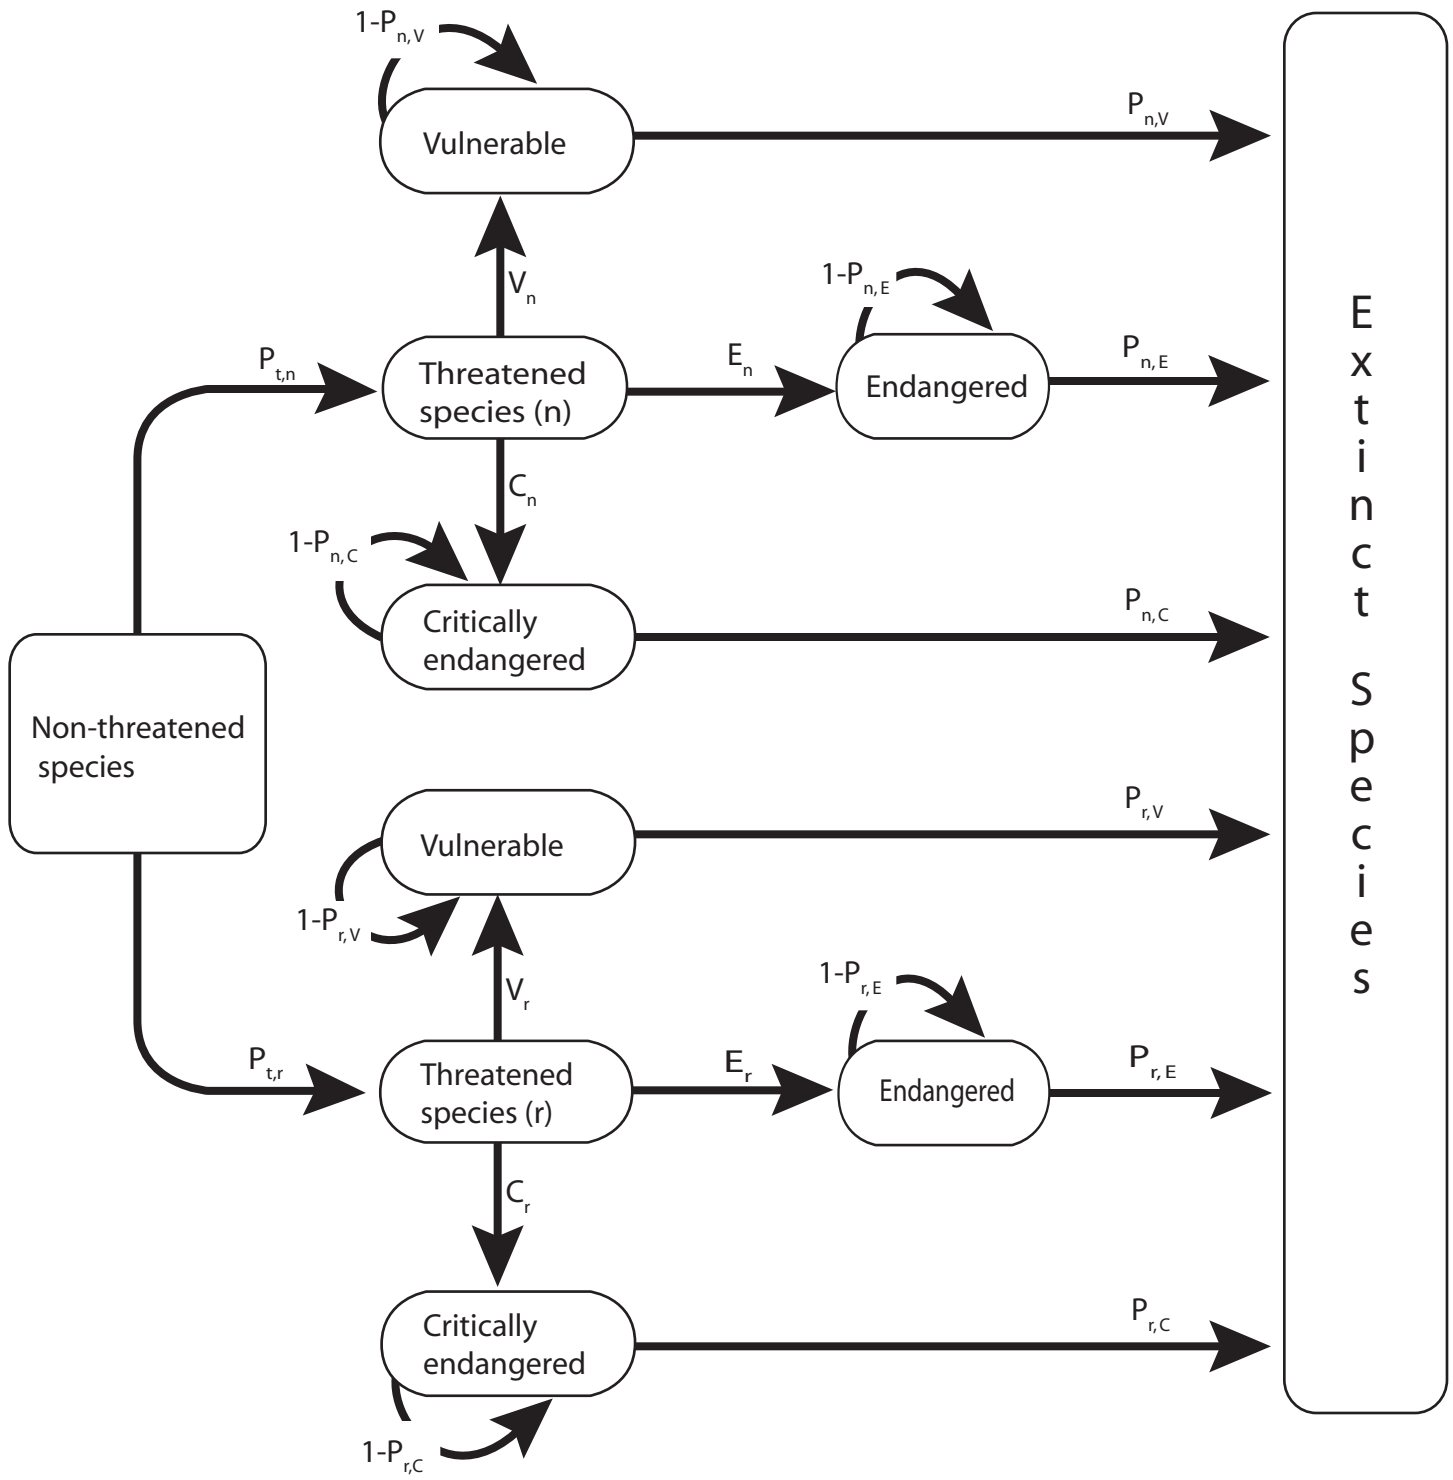

| Scenario 1                    | Scenario 2 (2020-2030) |                    | Scenario 3 (2020-2030) |                    |
|-------------------------------|------------------------|--------------------|------------------------|--------------------|
| $P_{tn} = P_{tr} = 0$         | $P_{tn} = 0.0033$      | $P_{tr} = 0.0426$  | $P_{tn} = 0.0062$      | $P_{tr} = 0.0836$  |
| $P_{n,V} = P_{r,V} = 0.01048$ | $P_{n,V} = 0.0048$     | $P_{r,V} = 0.0131$ | $P_{n,V} = 0.0047$     | $P_{r,V} = 0.0129$ |
| $P_{n,E} = P_{r,E} = 0.10557$ | $P_{n,E} = 0.0449$     | $P_{r,E} = 0.1218$ | $P_{n,E} = 0.0452$     | $P_{r,E} = 0.1204$ |
| $P_{n,C} = P_{r,C} = 0.5$     | $P_{n,C} = 0.2708$     | $P_{r,C} = 0.7396$ | $P_{n,C} = 0.2636$     | $P_{r,C} = 0.6281$ |

$V_n = 0.5351$        $E_n = 0.3118$        $C_n = 0.1531$       r      Restricted range species  
 $V_r = 0.7071$        $E_r = 0.1465$        $C_r = 0.1464$       n      Remaining species
