# Supplementary material
Source: PubMed Central journal article supplement (PMC539768)

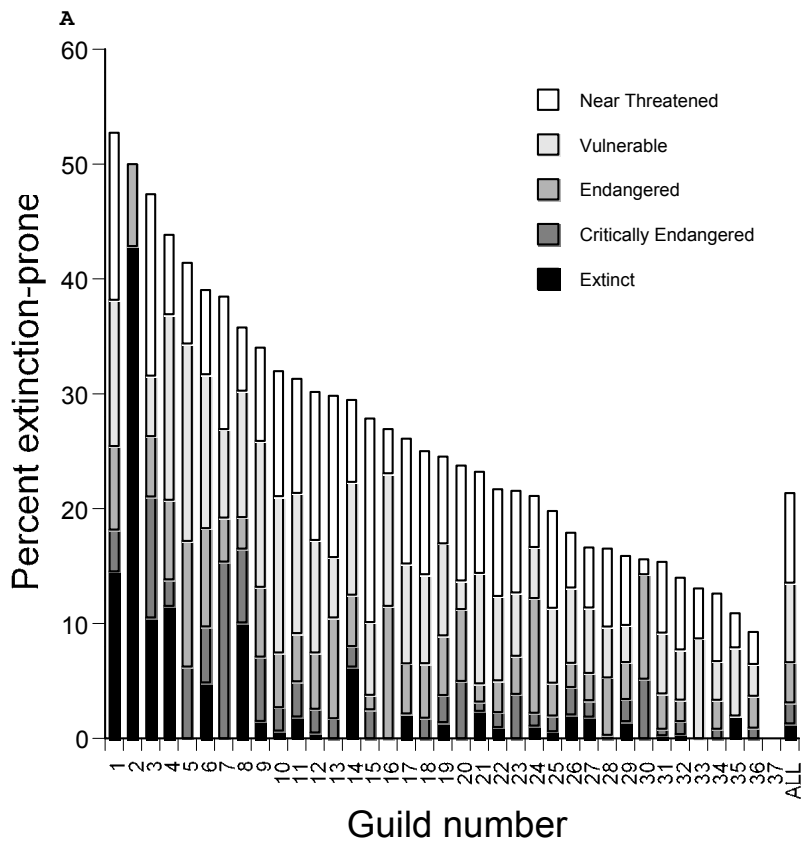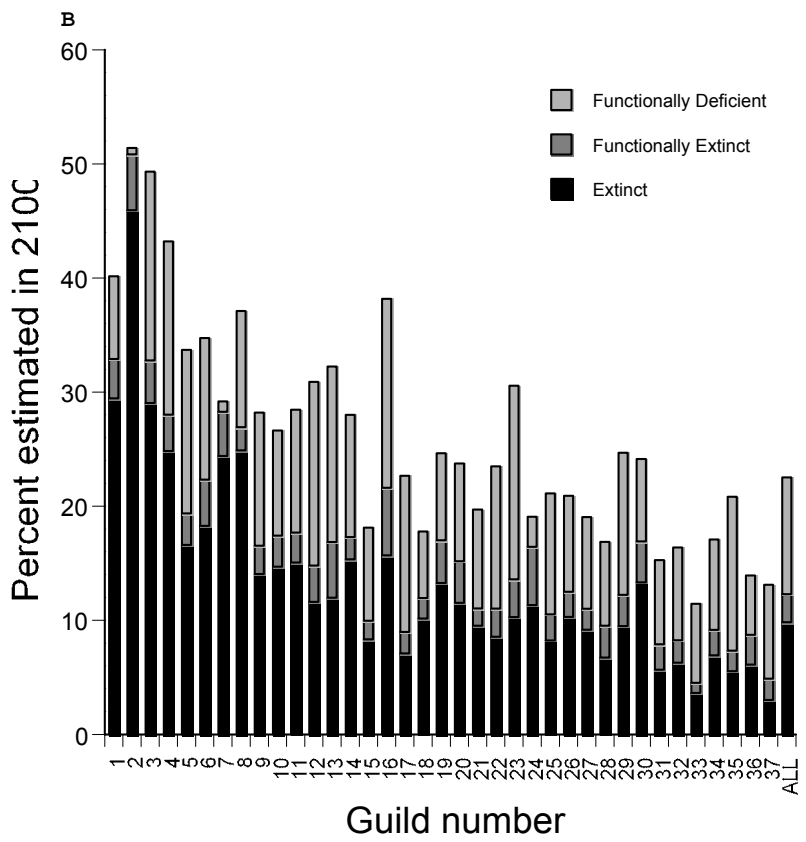

Supplement: pnas_101_52_18042__5.pdf [file pnas_101_52_18042__5.pdf]

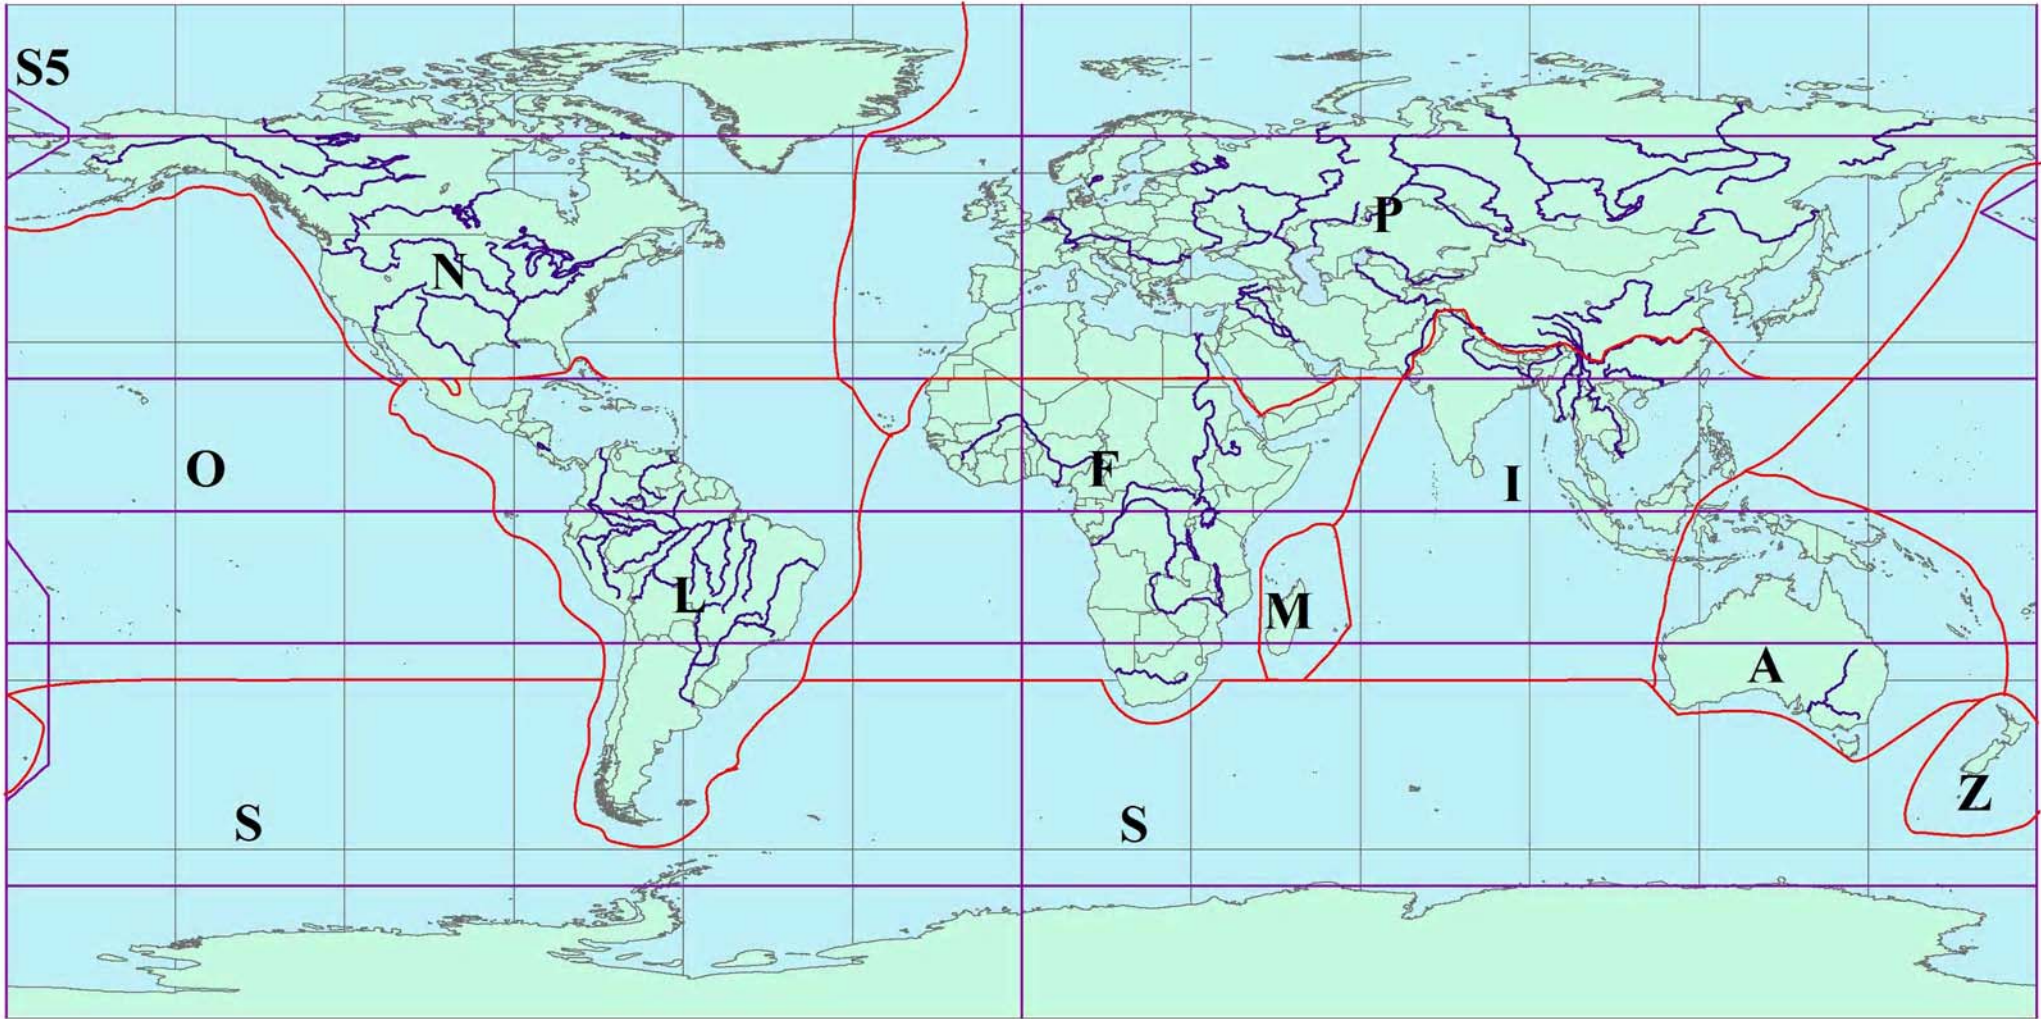

Supplement: pnas_101_52_18042__7.pdf [file pnas_101_52_18042__7.pdf]
